# Supplementary material
Source: publisher figshare collection journal article supplement (https://gsapubs.figshare.com/articles/dataset/_/19401125)

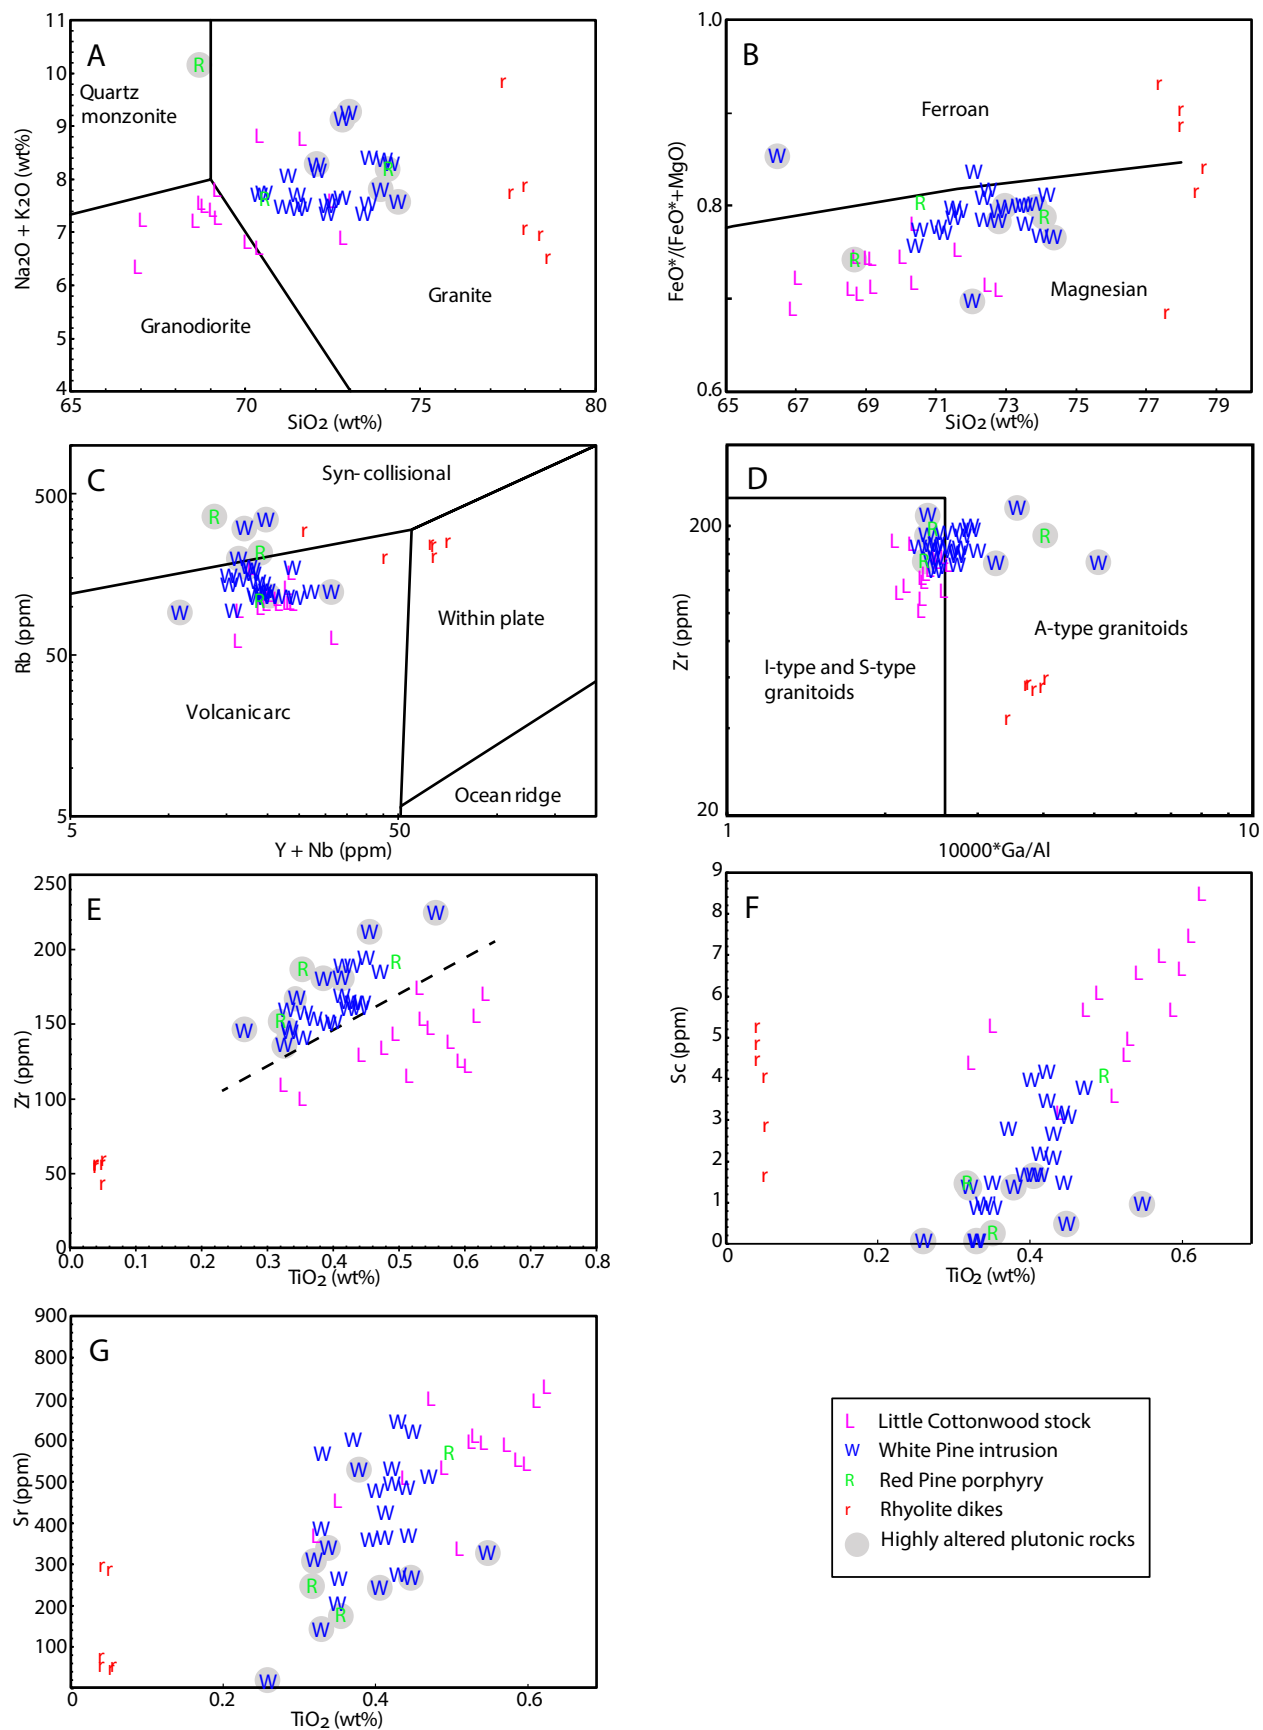

Fig. 6

Supplement: Supplementary file 1 [file 1]

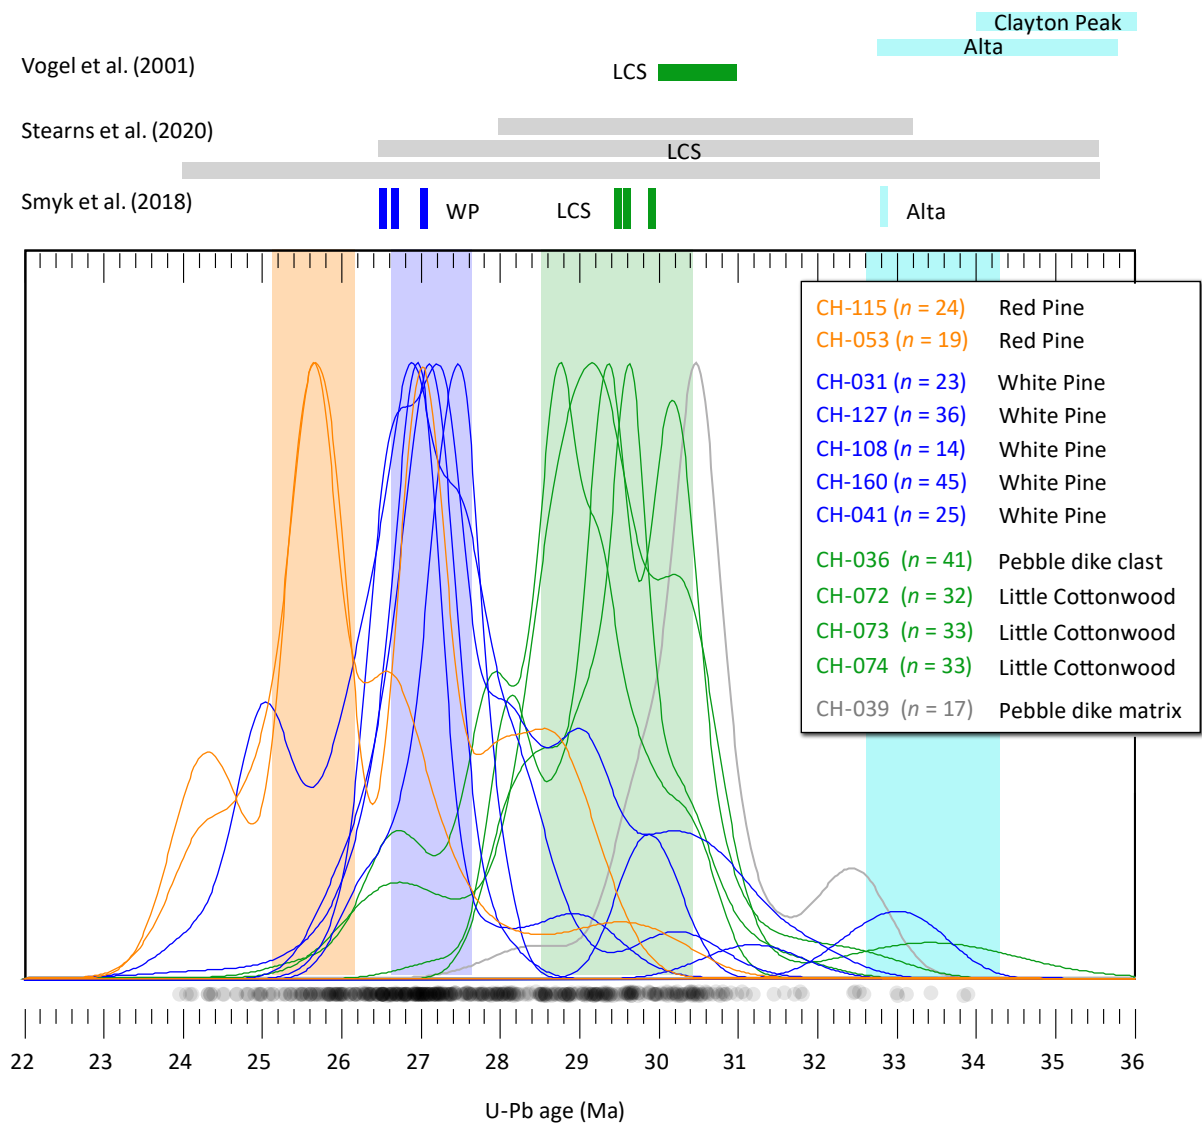

Fig. 5

Supplement: Supplementary file 2 [file 1]

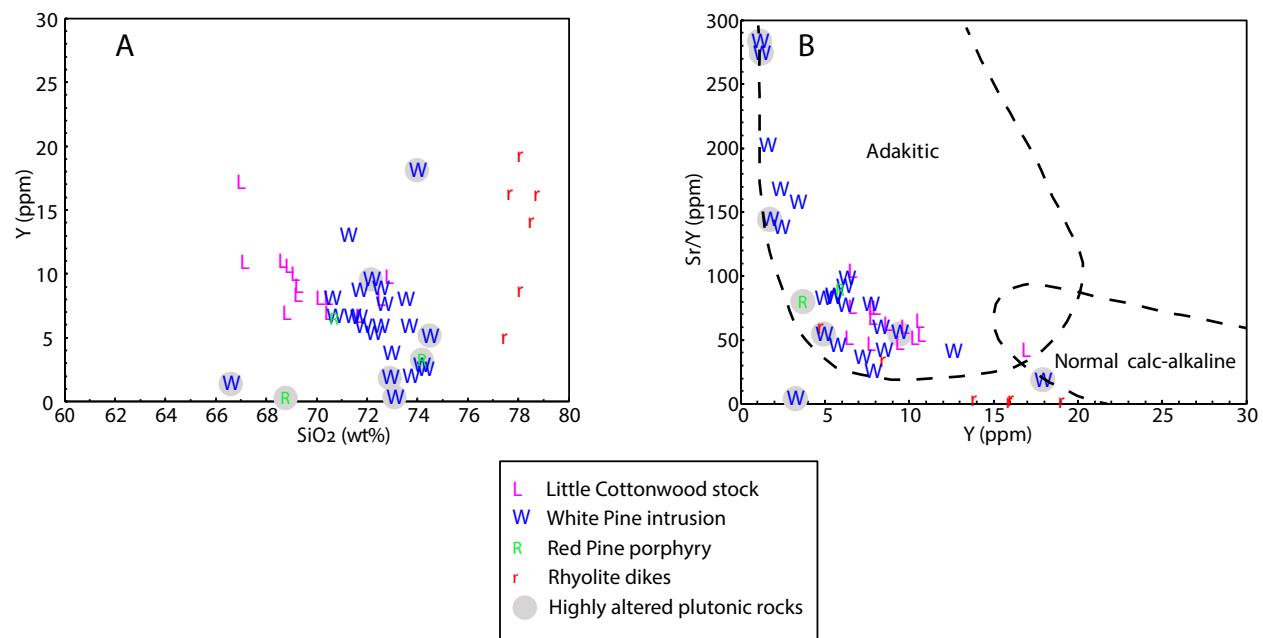

Fig. 13

Supplement: Supplementary file 3 [file 1]

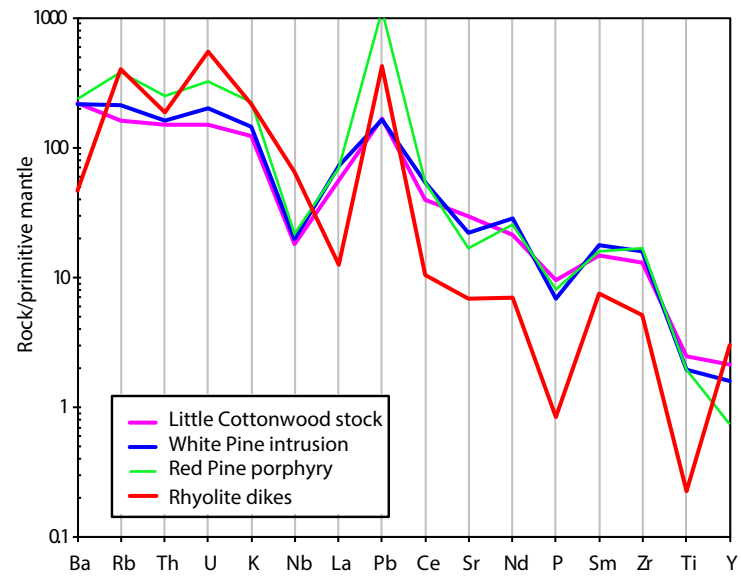

Fig. 11

Supplement: Supplementary file 4 [file 1]

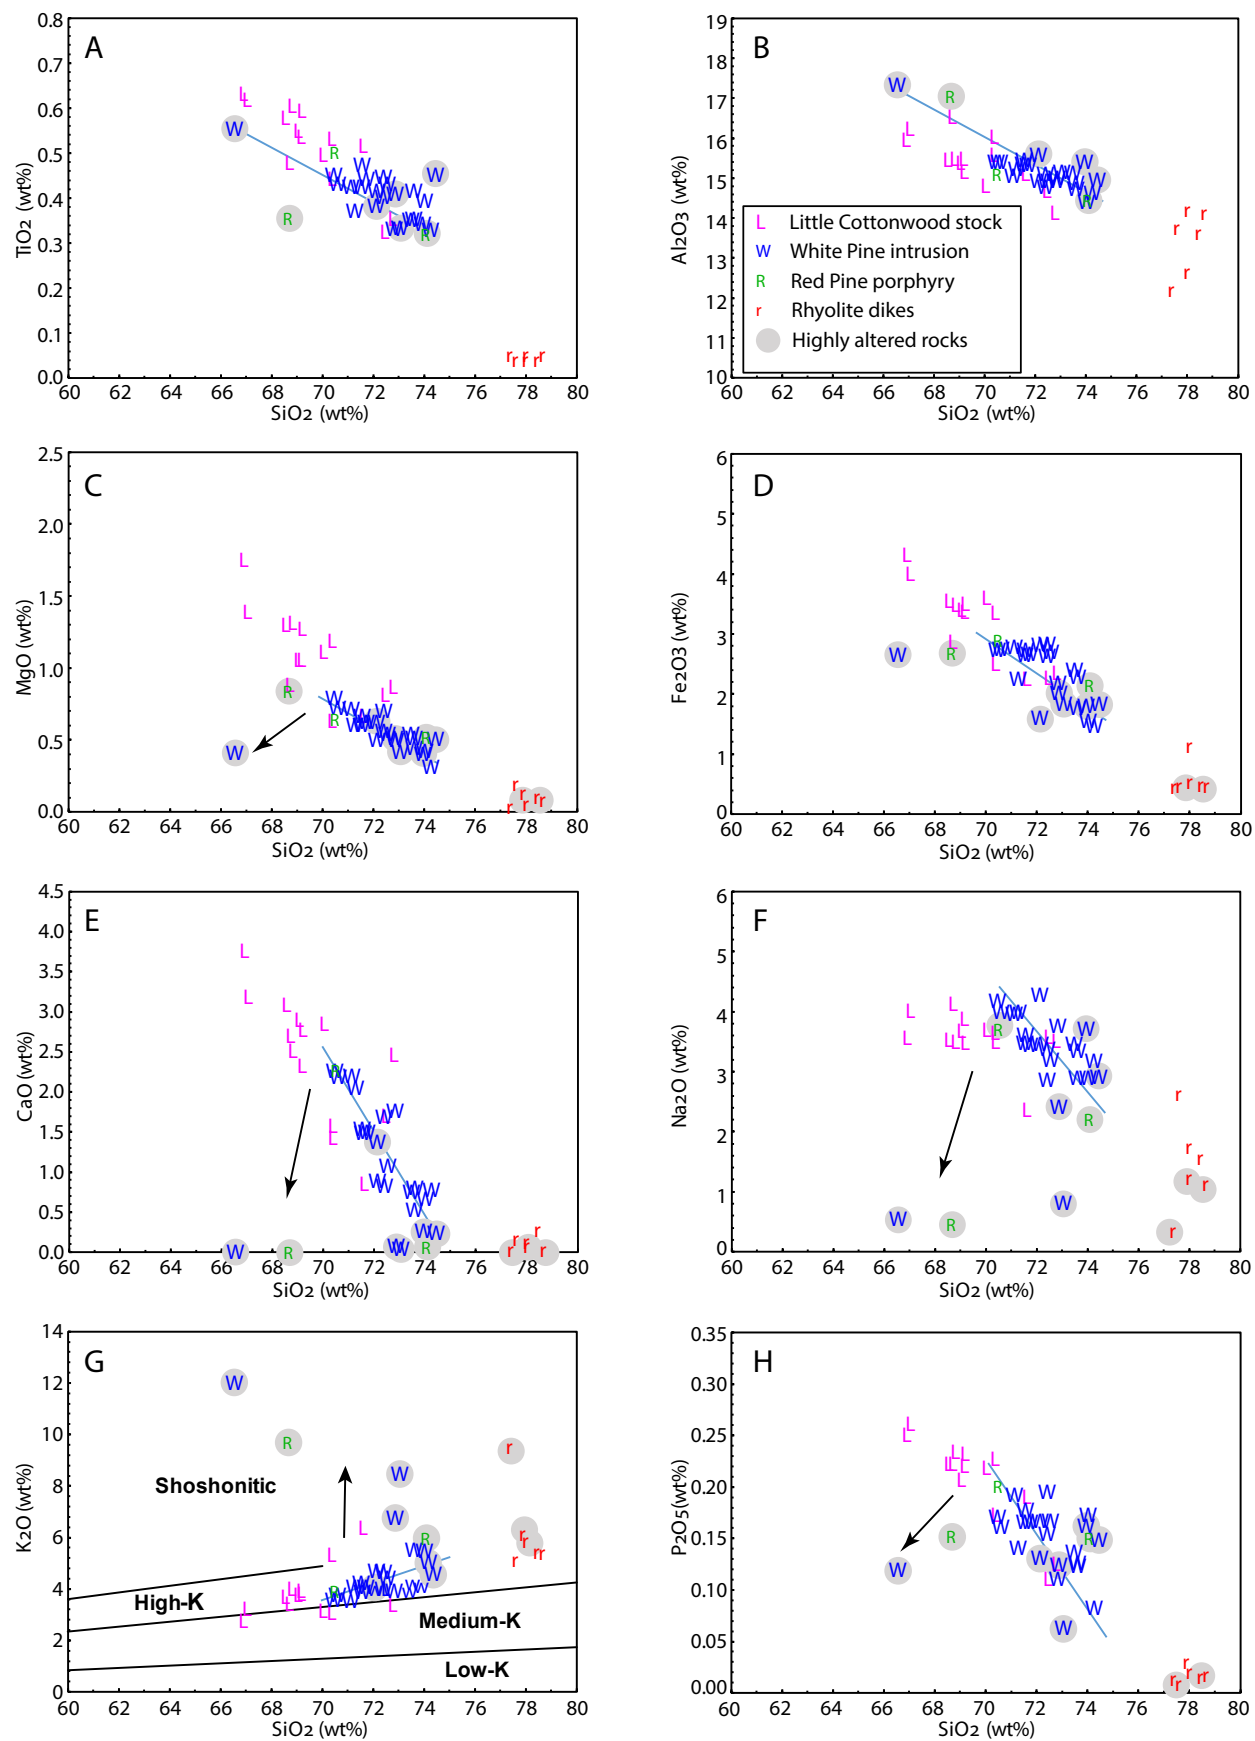

Fig. 9

Supplement: Supplementary file 5 [file 1]

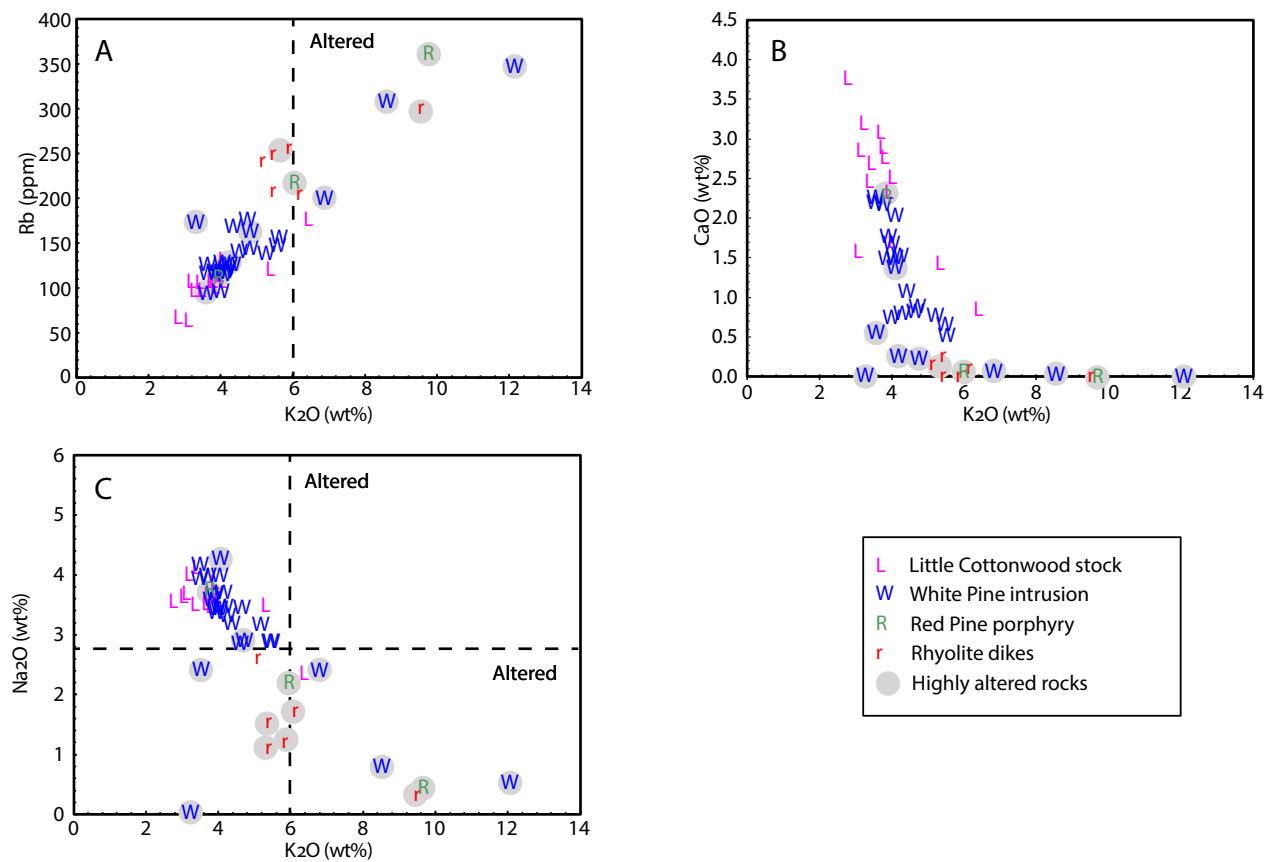

Fig. 12

Supplement: Supplementary file 6 [file 1]
